# Supplementary material for: Damaged DNA Is an Early Event of Neurodegeneration in Induced Pluripotent Stem Cell-Derived Motoneurons with UBQLN2P497H Mutation
Source: MDPI journal article supplement (doi:10.3390/ijms231911333), 2022-09-26
Supplement: s1 [file s1]

Supplemental Information

A

Target: **fastalInput.fa**  
Rank: **2**  
Target sequence: **GTAGGCCAGTCACCCCATAGG**

| Off-targets    |                      |                                 |
|----------------|----------------------|---------------------------------|
| Location       | Number of mismatches | Sequence (including mismatches) |
| chr10:93426032 | 3                    | CCCeTGGGGGTGCTGGGCCTtC          |
| chr3:128427726 | 3                    | CCGAgGGGaGTAgTGGGCCTAC          |
| chr5:2998390   | 2                    | CCAATGGGGGTGACTGGGgATAC         |
| chrX:56565347  | 0                    | GTAGGCCAGTCACCCCATAGG           |

B

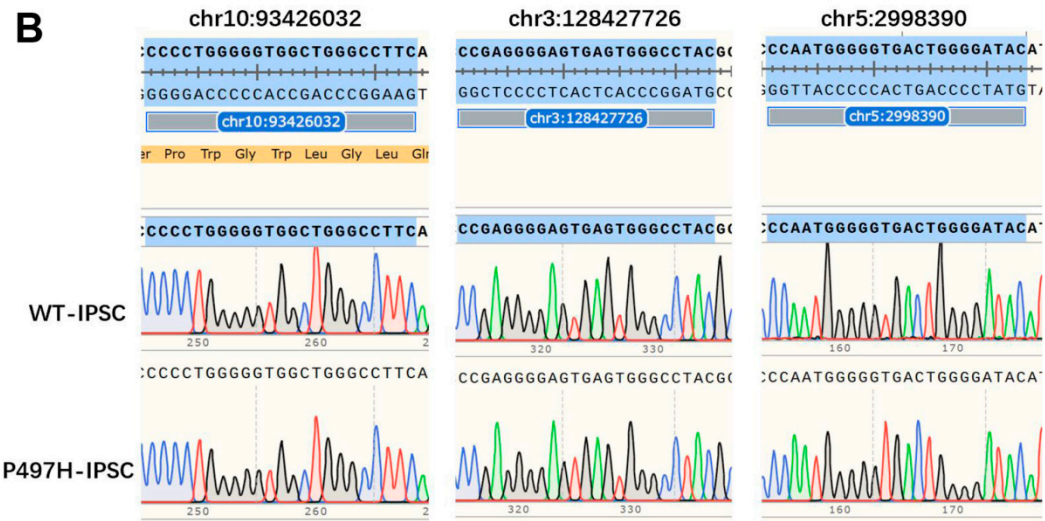

**Figure S1.** Potential off-target events in the CRISPR/Cas9 hiPSC. Related to Figure 1.  
(A) Cas9 gRNA of hUBQLN2 sequence is on the top. Chromosomal position, number of nucleotide mismatch and DNA sequence in genome potential off-target sites are shown.  
(B) The sequences around chr10:93426032, chr3:128427726 and chr5:2998390 of WT and P497H iPSC were analyzed by sanger sequencing

**A**

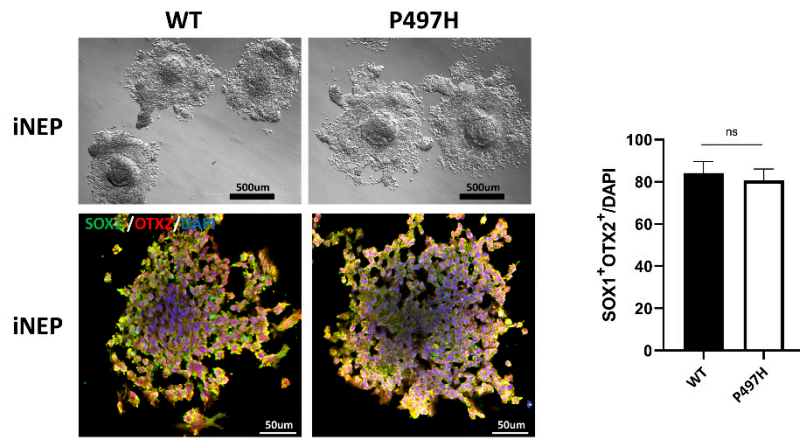

**B**

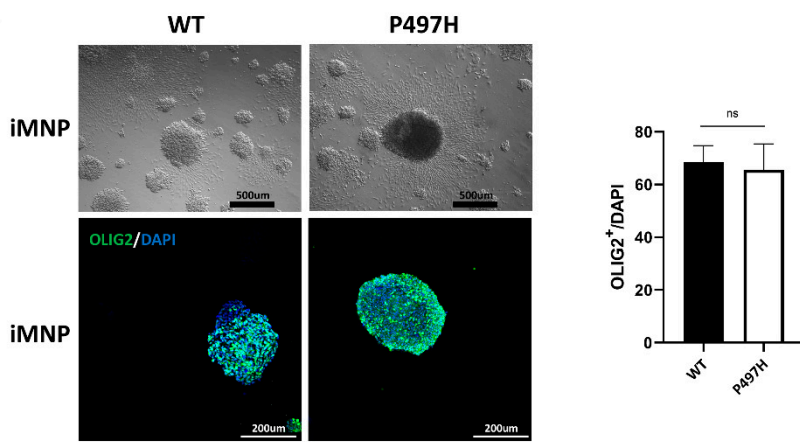

**C**

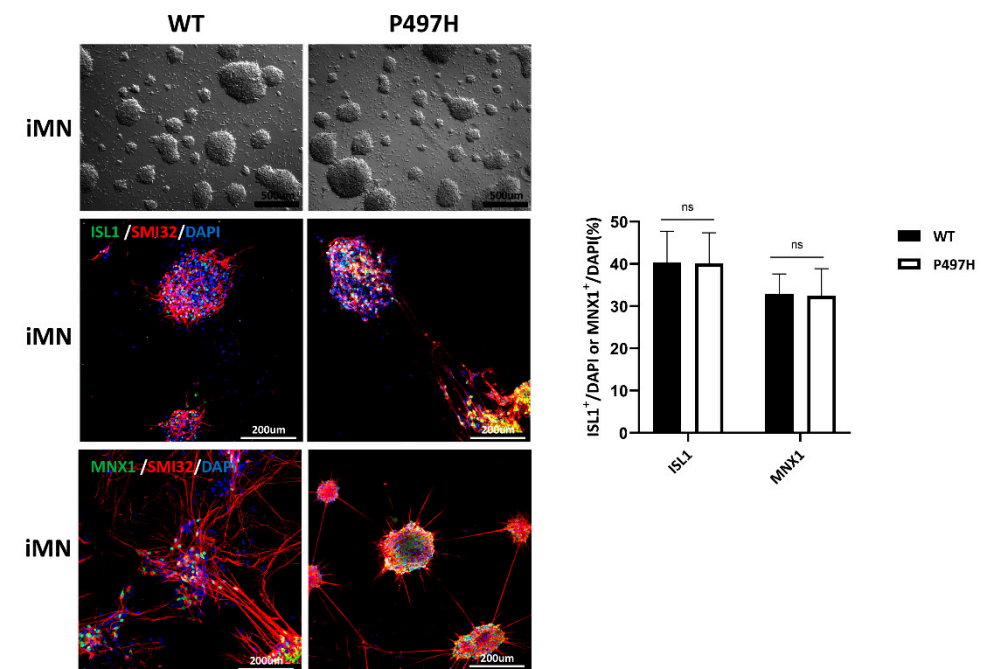

**Figure S2.** Differentiation of iPSCs into motor neuron. Related to Figure 2.

(C) Bright field image and immunostaining of representative WT and mutant iNEP at day 6.

Quantification of iNEP markers (SOX1 and OTX2). DAPI was used to visualize the nucleus.

(D) Bright field image and immunostaining of representative WT and mutant iMNP at day 12.

Quantification of iMNP marker (OLIG2). DAPI was used to visualize the nucleus.

(E) Bright field image and immunostaining of representative WT and mutant iMN at day 18.

Quantification of iMN markers (ISL1 and MNX1). DAPI was used to visualize the nucleus.

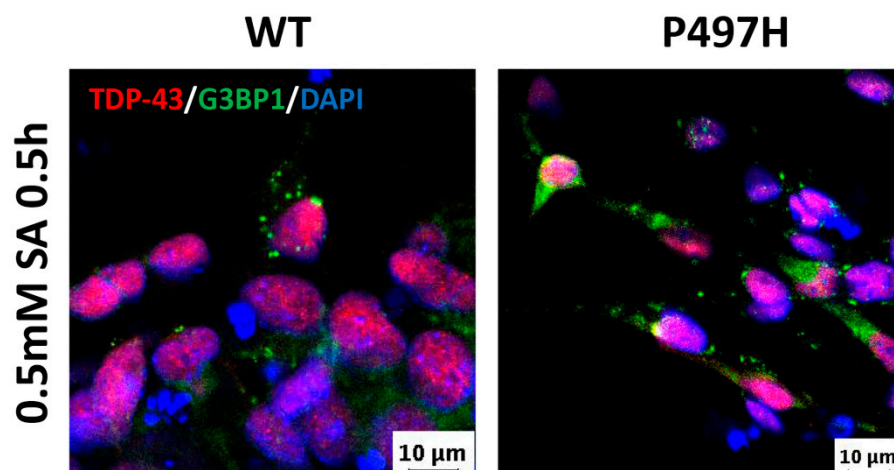

**Figure S3.** The acute oxidative stress was not able to induce the formation of TDP-43 aggregates. Related to Figure 4.

Representative confocal images of TDP-43 (red) and G3BP1 (green) in WT and mutant MNs under the acute oxidative stress (0.5mM SA 0.5h). Nuclei are stained in blue (DAPI) in all merged images.

**Supplementary Table S1.** Primers for RT-qPCR.

| Gene  | Forward (5'-3')         | Reverse (5'-3')        |
|-------|-------------------------|------------------------|
| NANOG | TGAACCTCAGCTACAAACAG    | TGGTGGTAGGAAGAGTAAAG   |
| OCT4  | CCTCACTTCACTGCACTGTA    | CAGGTTTTCTTTCCCTAGCT   |
| SOX2  | CCCAGCAGACTTCACATGT     | CCTCCCATTTCCTCGTTTT    |
| GAPDH | ACACCCACTCCTCCACCTTT    | TTACTCCTTGGAGGCCATGT   |
| FUS   | TCCCAGCAGAGCAGTCAGCCCTA | CCTGGGGAGTTGACTGAGTTCC |
| CHAT  | GGCCTTCTACAGGCTCCATC    | GTCAGTCACGGCTCTCACAA   |
